# Supplementary material for: Toxicokinetics of Hydrolyzed Fumonisin B1 after Single Oral or Intravenous Bolus to Broiler Chickens Fed a Control or a Fumonisins-Contaminated Diet
Source: PubMed Central journal article supplement (PMC7354465; doi:10.3390/toxins12060413), 2020-06-21
Supplement: toxins-12-00413-s001.pdf [file toxins-12-00413-s001.pdf]

# Supplementary Materials: Toxicokinetics of Hydrolyzed Fumonisin B<sub>1</sub> After Single Oral or Intravenous Bolus to Broiler Chickens Fed a Control or a Fumonisin-Contaminated Diet

Gunther Antonissen, Siegrid De Baere, Barbara Novak, Dian Schatzmayr,  
Danica den Hollander, Mathias Devreese and Siska Croubels

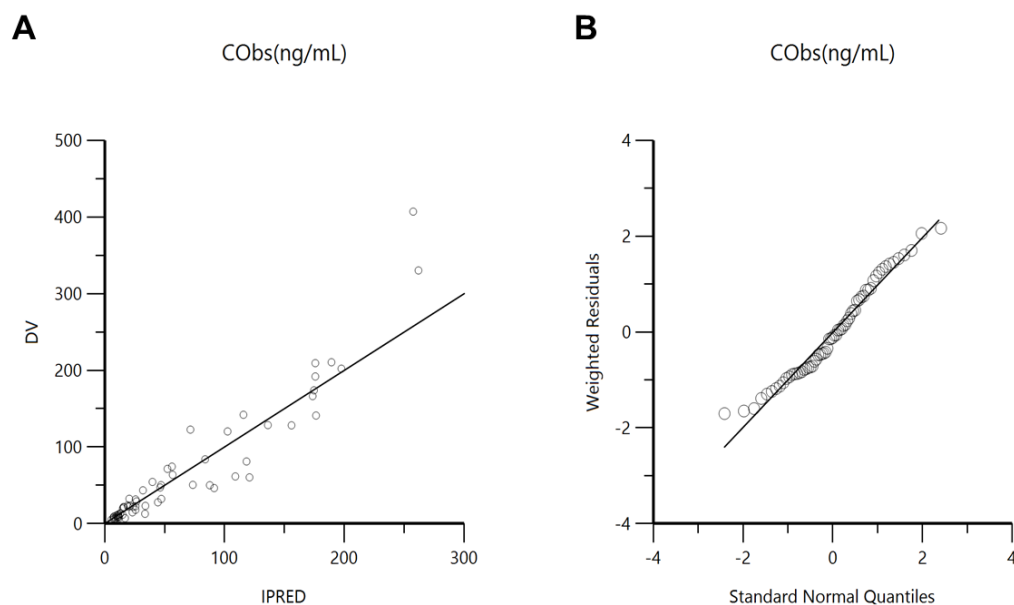

**Figure S1.** Visual evaluation of the population model of HFB<sub>1</sub> after intravenous (IV) dosing: scatter plot of the population dependent variable (DV), namely observed plasma concentration ( $C_{obs}$ ), versus the individually predicted plasma concentration values (IPRED) (**A**) and QQ plot of the conditionally weighted residuals of  $C_{obs}$  (**B**).
